# Supplementary material
Source: PubMed Central journal article supplement (PMC4308422)
Supplement: NIHMS647875-supplement-1.pdf [file NIHMS647875-supplement-1.pdf]

**Supplemental Table I**

Supplemental Table I: Example scenarios and rules applied in the analysis of each scenario

| <i>Scenario</i> | <i>Visit 1</i>    | <i>Intensification occurred?</i> | <i>Visit 2</i>    | <i>Intensification occurred?</i> | <i>Analysis</i>                                                                                                                                               |
|-----------------|-------------------|----------------------------------|-------------------|----------------------------------|---------------------------------------------------------------------------------------------------------------------------------------------------------------|
| 1               | July 1<br>160/100 | No                               | July 7<br>160/100 | July 7<br>Yes                    | First visit satisfied by intensification within 7 days<br>Second visit excused<br>Numerator =1, denominator =1                                                |
| 2*              | July 1<br>160/100 | No                               | July 7<br>160/100 | No                               | First visit excused by second visit within 7 days<br>Second visit not satisfied by intensification<br>Numerator =0, denominator =1                            |
| 3               | July 1<br>160/100 | July 5<br>Yes                    | July 7<br>160/100 | No                               | First visit satisfied by intensification within 7 days<br>Second visit satisfied by intensification within 7 days in the past<br>Numerator =1, denominator =1 |
| 4               | July 1<br>160/100 | July 5<br>Yes                    | July 7<br>160/100 | July 10<br>Yes                   | First visit satisfied by intensification within 7 days<br>Second visit satisfied by another intensification<br>Numerator =2, denominator =2                   |
| 5               | July 1<br>160/100 | No                               | July 7<br>130/80  | No                               | First visit > 160 so not excused by second visit within 7 days<br>Second visit not eligible for intensification<br>Numerator =0, denominator =1               |
| 6               | July 1<br>145/80  | No                               | July 7<br>130/80  | No                               | First visit between 141 and 160 visit excused by second visit within 7 days<br>Second visit not eligible for intensification<br>Numerator =0, denominator =0  |
| 7               | July 1<br>160/100 | No                               | July 5<br>130/80  | July 7<br>Yes                    | First visit satisfied by intensification within 7 days<br>Second visit not eligible for intensification<br>Numerator =1, denominator =1                       |

\* 7-day look-ahead rule only applied once for consecutive overlapping situations.
